# Supplementary material for: Study protocol: Return to Country, an Australia-wide prospective observational study about returning First Nations renal patients home
Source: PubMed Central journal article supplement (PMC11590795; doi:10.1136/bmjopen-2024-095727), 2024-11-24
Supplement: bmjopen-2024-095727.reviewer_comments.pdf [file bmjopen-2024-095727.reviewer_comments.pdf]

## **PEER REVIEW HISTORY**

BMJ Open publishes all reviews undertaken for accepted manuscripts. Reviewers are asked to complete a checklist review form and are provided with free text boxes to elaborate on their assessment. These free text comments are reproduced below.

## **ARTICLE DETAILS**

### **Title (Provisional)**

Study protocol: Return to Country, an Australia-wide prospective observational study about returning First Nations renal patients home

### **Authors**

Jones, Yomei; Truong, Mandy; Preece, Cecilia; Cass, Alan; Heerink, Fiona; McDonald, Stephen; Jones, Scott; Mallett, Andrew John; Majoni, Sandawana William; Sajiv, Cherian; Patankar, Khalil; Mulholland, Eddie; Woldeyohannes, Solomon; Lawton, Paul

This article was not externally reviewed at BMJ Open. Protocols that have been independently assessed prior to submission to BMJ Open are usually fast-tracked to publication on the grounds that further substantial changes will not be possible. This independent assessment will usually be external, independent review for both a substantial grant award from a non-commercial or government funder and ethics approval.
